# Supplementary material for: HDAC-4 regulates claudin-2 expression in EGFR-ERK1/2 dependent manner to regulate colonic epithelial cell differentiation
Source: PubMed Central journal article supplement (PMC5675667; doi:10.18632/oncotarget.21190), 2017-09-23
Supplement: oncotarget-08-87718-s001.pdf [file oncotarget-08-87718-s001.pdf]

# HDAC-4 regulates claudin-2 expression in EGFR-ERK1/2 dependent manner to regulate colonic epithelial cell differentiation

## SUPPLEMENTARY MATERIALS

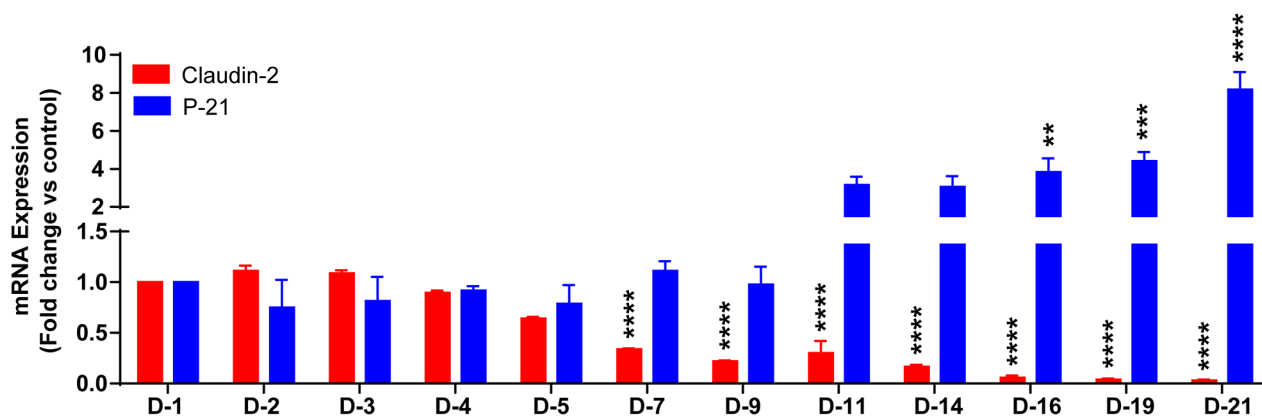

**Supplementary Figure 1: qRT-PCR analysis of claudin-2 and P-21<sup>waf1/cip1</sup> in Caco-2 cell model of spontaneous differentiation.** AT least three independent experiments were performed. Data is presented as mean ± S.E.M. \*\*P<0.01 and \*\*\* P<0.001 versus control.

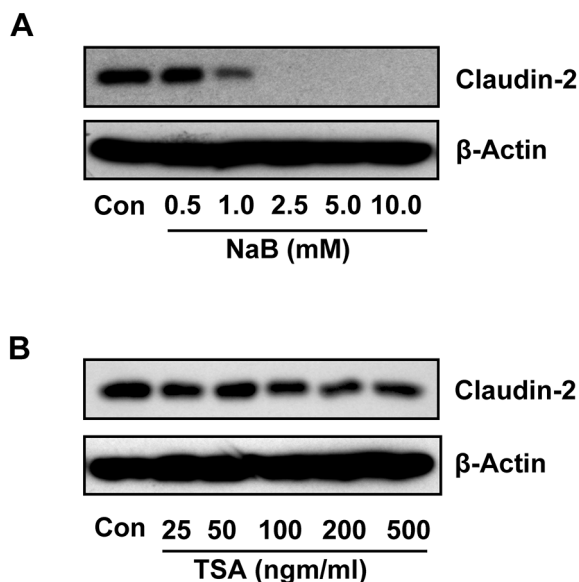

**Supplementary Figure 2: (A-B).** Immunoblot analysis using anti-claudin-2 antibody and cell lysate prepared from HT29 cells treated with NaB and TSA.

Supplementary Table 1: Reagents and antibody

| SN# | Antibody       | Company                                    | Catalog#    |
|-----|----------------|--------------------------------------------|-------------|
| 1   | Claudin-2      | Invitrogen San Francisco, CA,<br>U.S.A.    | 325600      |
| 2   | Claudin-4      | Invitrogen San Francisco, CA,<br>U.S.A.    | 329400      |
| 3   | $\beta$ -Actin | Sigma, St Louis, MO, U.S.A.                | A2228-100UL |
| 4   | HDAC-4         | Upstate NY, U.S.A.                         | ABE262      |
| 5   | HDAC-3         | Upstate NY, U.S.A.                         | 05813       |
| 6   | ZO-1           | Invitrogen San Francisco, CA,<br>U.S.A.    | 617300      |
| 7   | P-27           | Santa Cruz biotechnology Dallas,<br>U.S.A. | Sc-528      |
| 8   | p-21           | Santa Cruz biotechnology Dallas,<br>U.S.A. | Sc-6246     |
| 9   | EGFR           | Invitrogen San Francisco, CA,<br>U.S.A.    | MAS-13269   |
| 10  | P-EGFR         | Santa Cruz biotechnology Dallas,<br>U.S.A. | Sc-101668   |
| 11  | ERK            | Cell Signaling Beverly, MA,<br>U.S.A.      | 9102s       |
| 12  | P-ERK          | Cell Signaling Beverly, MA,<br>U.S.A.      | 4370s       |
| 13  | Cyclin-D1      | Cell Signaling Beverly, MA,<br>U.S.A.      | 2978s       |
| 14  | C-myc          | Santa Cruz biotechnology Dallas,<br>U.S.A. | Sc-40       |
| 15  | HDAC-4 siRNA   | Cell Signaling Beverly, MA,<br>U.S.A.      | 7595        |

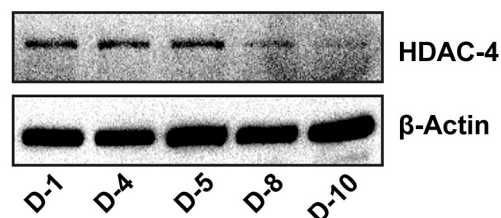

Supplementary Figure 3: Immunoblot analysis using anti-HDAC-4 antibody and cell lysate from HT29 cells subjected to spontaneous differentiation.

**Supplementary Table 2: Inhibitors**

| SN# | Inhibitor                          | Company                                      | Catalog# |
|-----|------------------------------------|----------------------------------------------|----------|
| 1   | Sodium Butyrate                    | Millipore Billerica<br>Massachusetts, U.S.A. | 567430   |
| 2   | Trichostatin A                     | Millipore Billerica<br>Massachusetts, U.S.A. | 647925   |
| 3   | Suberoylanilide hydroxamic<br>acid | Sigma St Louis, MO, USA                      | SML0061  |

**Supplementary Table 3: Primers sequence**

| SN# | Primer             | Sequence              |
|-----|--------------------|-----------------------|
| 1   | Claudin-2(Forward) | ctccctcgctgcattatctc  |
| 2   | Claudin-2(Reverse) | cagtggtgagaagtccecg   |
| 3   | P-21 (Forward)     | tgccgctcagaacctatgc   |
| 4   | P-21(Reverse)      | aaagtcgaagttccatcgctc |
